## Prospective application of a risks-adjusted antithrombotic protocol in elderly patients treated with the last generation of everolimus-eluting stents. The SIERRA-75 (EPIC-05) registry

J.M. De La Torre Hernandez<sup>1</sup>, R. Lopez Palop<sup>2</sup>, J.M. Jimenez Mazuecos<sup>3</sup>, P. Carrillo Saez<sup>2</sup>, A. Gutierrez Barrios<sup>4</sup>, E. Pinar<sup>5</sup>, B. Cid<sup>6</sup>, L. Fernandez<sup>7</sup>, T. Garcia Camarero<sup>1</sup>, C. Urbano<sup>8</sup>, J.F. Oteo<sup>9</sup>, V.A. Jimenez Diaz<sup>10</sup>, A. Gomez Menchero<sup>11</sup>, E. Galindo Fernandez<sup>12</sup>, A. Perez De Prado<sup>13</sup>

<sup>1</sup>H. Marques de Valdecilla, Santander, Spain; <sup>2</sup>University Hospital San Juan de Alicante, Alicante, Spain; <sup>3</sup>Albacete University Hospital, Albacete, Spain; <sup>4</sup>University Hospital Puerta del Mar, Cadiz, Spain; <sup>5</sup>Hospital Universitario Virgen Arrixaca, Murcia, Spain; <sup>6</sup>University Hospital of Santiago de Compostela, Santiago de Compostela, Spain; <sup>7</sup>Hospital de Cruces, Bilbao, Spain; <sup>8</sup>Regional University Hospital Carlos Haya, Malaga, Spain; <sup>9</sup>University Hospital Puerta de Hierro Majadahonda, Madrid, Spain; <sup>10</sup>Hospital Universitario Alvaro Cunqueiro, Vigo, Spain; <sup>11</sup>Hospital Juan Ramon Jimenez, Huelva, Spain; <sup>12</sup>Hospital Infanta Cristina de Badajoz, Badajoz, Spain; <sup>13</sup>Hospital of Leon (Complejo Asistencial Universitario de Leon), Leon, Spain

On behalf of SIERRA-75 (EPIC-05)

**Funding Acknowledgement:** Type of funding sources: Private grant(s) and/or Sponsorship. Main funding source(s): Abbott Laboratories

**Background:** Elderly patients show a higher incidence of ischemic and bleeding events after PCI.

**Purpose:** We sought to investigate clinical outcomes in elderly patients revascularized with last generation everolimus-eluting stent (EES) treated with antithrombotic strategies guided by bleeding and ischemic risks.

**Methods:** Prospective multicenter registry including patients over 75 years revascularized with EES and subsequent antithrombotic therapy guided according to a protocol based on clinical presentation, PCI complexity and the PRECISE DAPT score. The primary safety endpoint was a composite of cardiac death, myocardial infarction and definitive/probable stent thrombosis and the primary efficacy endpoint was TLR. An historical matched group of patients treated with current drug eluting stents other than EES was used as control.

**Results:** Finally, 1,064 patients were included, 80.8±4.2 years, 36.6%

women, 72% ACS and 53.6% complex PCI. Primary safety endpoint was met in 6.2% and primary efficacy endpoint in 1.5%. Bleeding BARC 2–5 was reported in 7.8% and definite or probable stent thrombosis in 1.3%. The multivariable adjusted model showed no significant association of the prescribed short/long therapies with any endpoint. No stent thrombosis were reported in the subgroup with shorter DAPT duration. As compared to control group, bleeding BARC 2–5 was significantly lower in SIERRA-75 group (7.4% vs 10.2%, p=0.04) as well as the composite of MACE and bleeding (14.3% vs 18.5%, p=0.02).

**Conclusions:** In elderly population the use of last generation EES along with a predefined risks-adjusted antithrombotic regimen seems to be associated with an improved prognosis in terms of ischemic and bleeding outcomes.
